# Supplementary material for: Transcriptome analysis reveals the role of the root hairs as environmental sensors to maintain plant functions under water-deficiency conditions
Source: PubMed Central journal article supplement (PMC4753848; doi:10.1093/jxb/erv498), 2015-11-19
Supplement: supp_erv498_Supplementary_Fig._S1.pdf [file supp_erv498_Supplementary_Fig._S1.pdf]

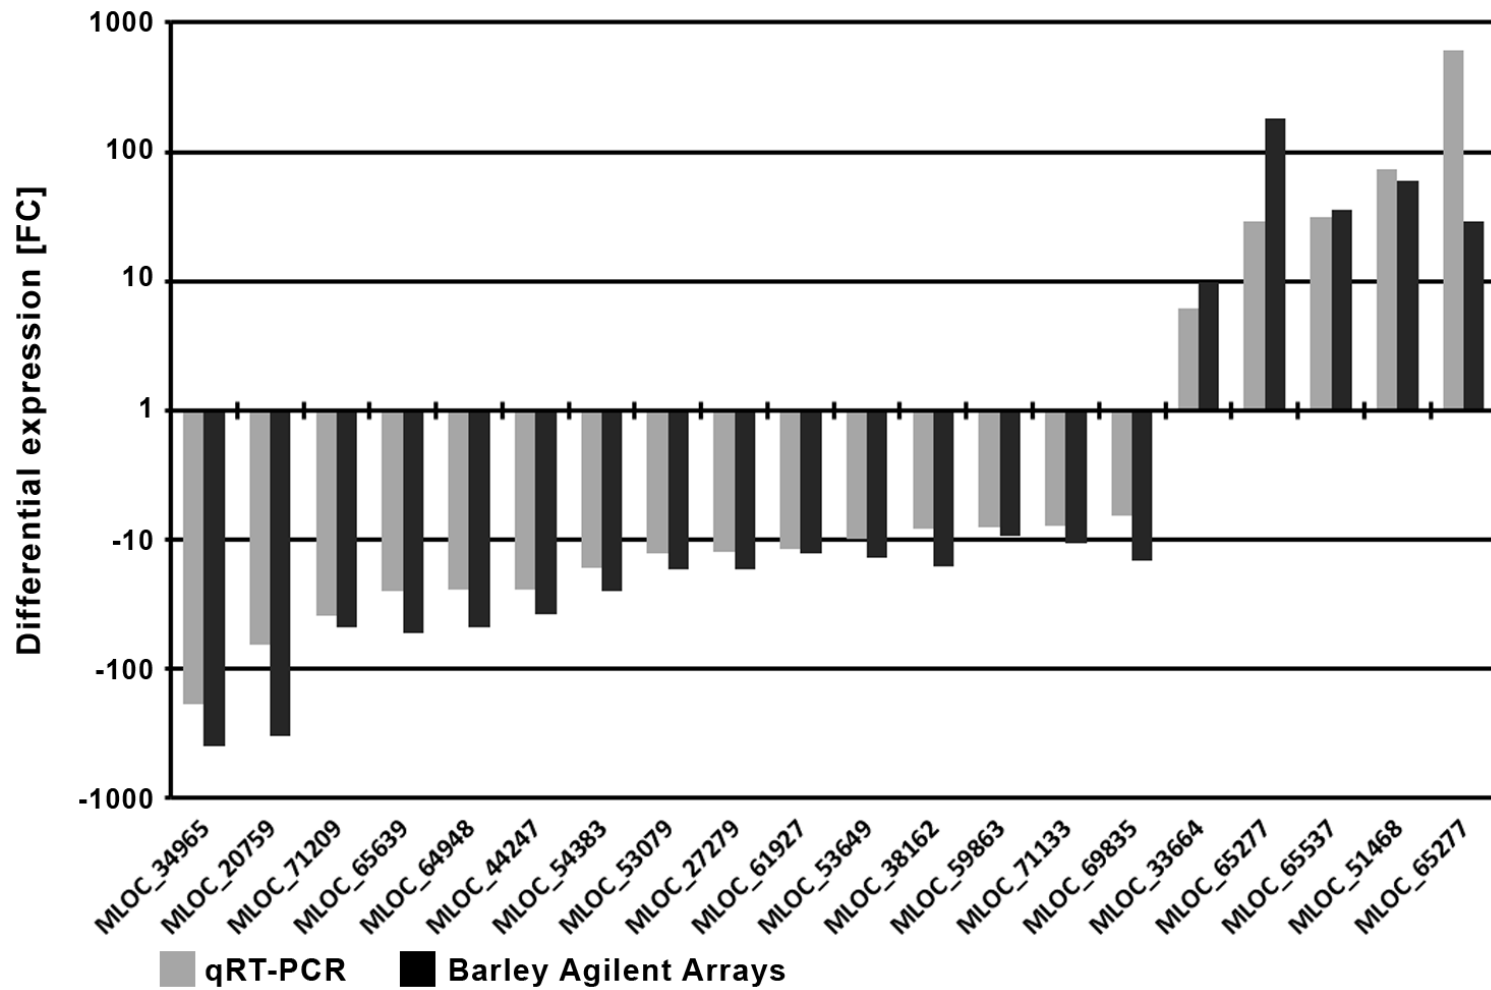

**Supplementary Figure S1.** Results of the gene expression analysis in the roots of the root hairless mutant *rhll.a* vs the WT cv. ‘Karat’ variety that was performed using gene-specific qRT-PCR and genome-wide Agilent Barley Gene Expression Arrays.
